# Supplementary material for: Weakened IL-15 Production and Impaired mTOR Activation Alter Dendritic Epidermal T Cell Homeostasis in Diabetic Mice
Source: PubMed Central journal article supplement (PMC5519720; doi:10.1038/s41598-017-05950-5), 2017-07-20

## Supplementary Legends

### Figure S1. The IL-15 production by keratinocytes was impaired in diabetic mice

6-8 weeks wild-type male C57BL/6J mice were administered STZ or vehicle for 6 days. At day 12 after STZ treatment, epidermis tissues were collected and primary keratinocytes were isolated. The isolated keratinocytes cultured with GolgiPlug for 6 hours, then IL-15 protein levels in keratinocytes were detected by means of FACS. Primary rabbit antibody to IL-15 (Santa Cruz Biotechnology, USA) and secondary FITC-conjugated anti-rabbit antibody (ZSGB-BIO, CHINA) was used for intracellular IL-15 staining. All data represent at least three independent experiments. The values were calculated as the mean  $\pm$  SD, \* $p$   $\leq$  0.05.

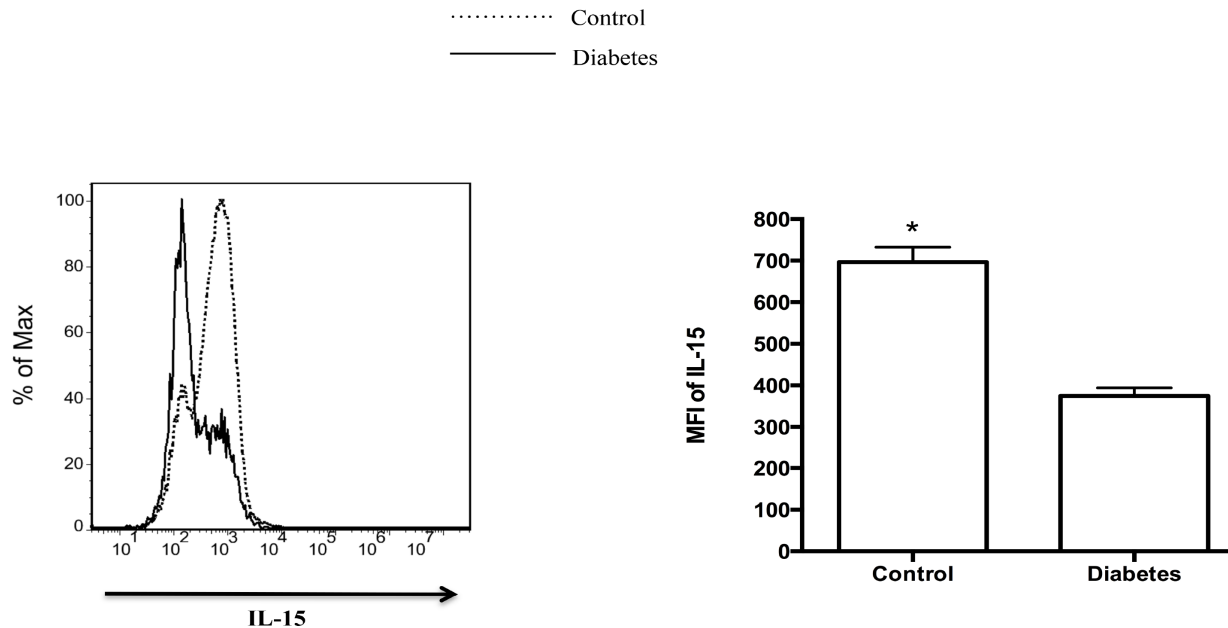

Figure S1

# **Weakened IL-15 Production and Impaired mTOR Activation Alter Dendritic Epidermal T Cell Homeostasis in Diabetic Mice**

Zhongyang Liu<sup>\*,#</sup>, Guangping Liang<sup>†,#</sup>, Li Gui<sup>‡,#</sup>, Yang bai<sup>†</sup>, Yashu Li<sup>†</sup>, Meixi Liu<sup>†</sup>, Xiaorong Zhang<sup>†,§</sup>, Xiaohong Hu<sup>†,§</sup>, Jian Chen<sup>†,§</sup>, Chibing Huang<sup>¶</sup>, Xusheng Liu<sup>\*</sup>, Gaoxing Luo<sup>†,§,##</sup>, Jun Wu<sup>†,§,##</sup>, Weifeng He<sup>†,§,##</sup>

# Raw data for Figure 1a

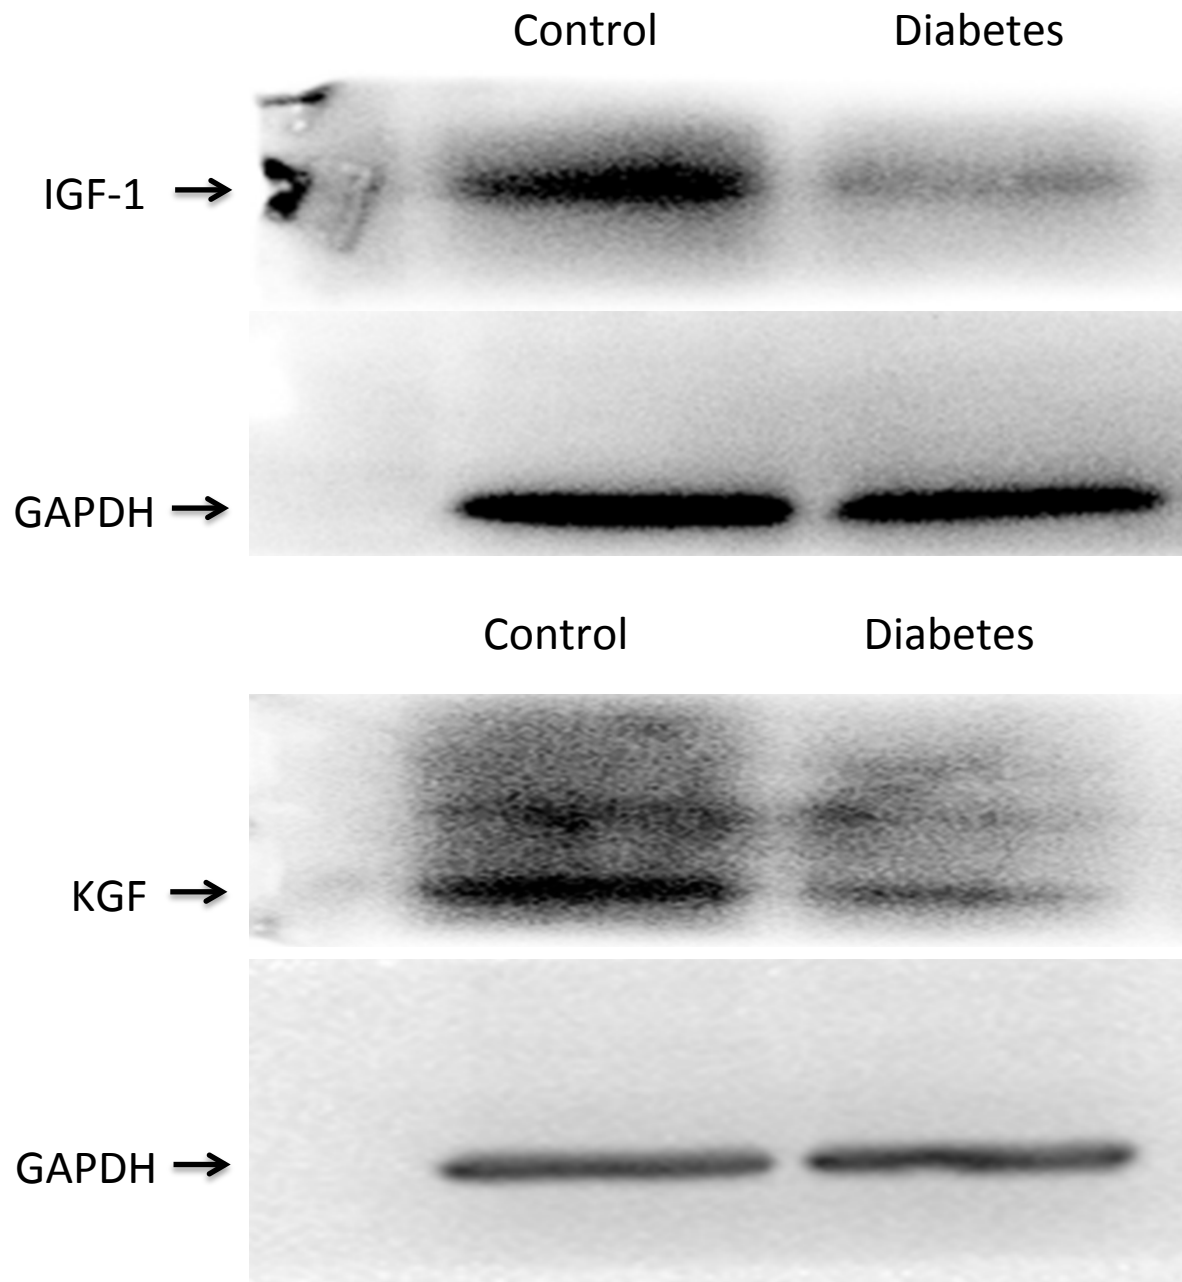

# Raw data for Figure 3b

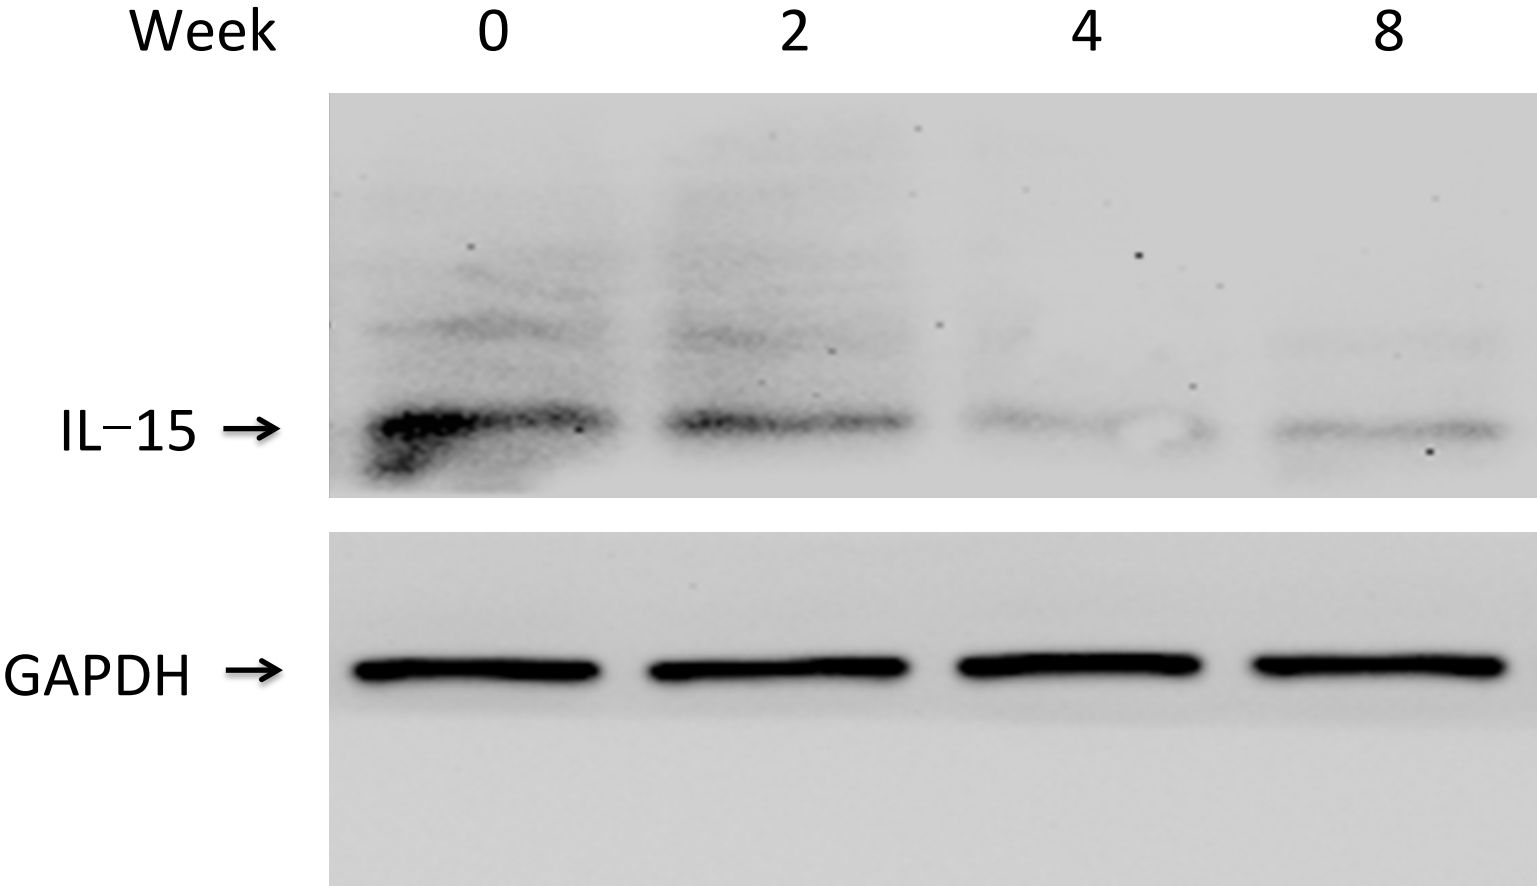

# Raw data for Figure 4b

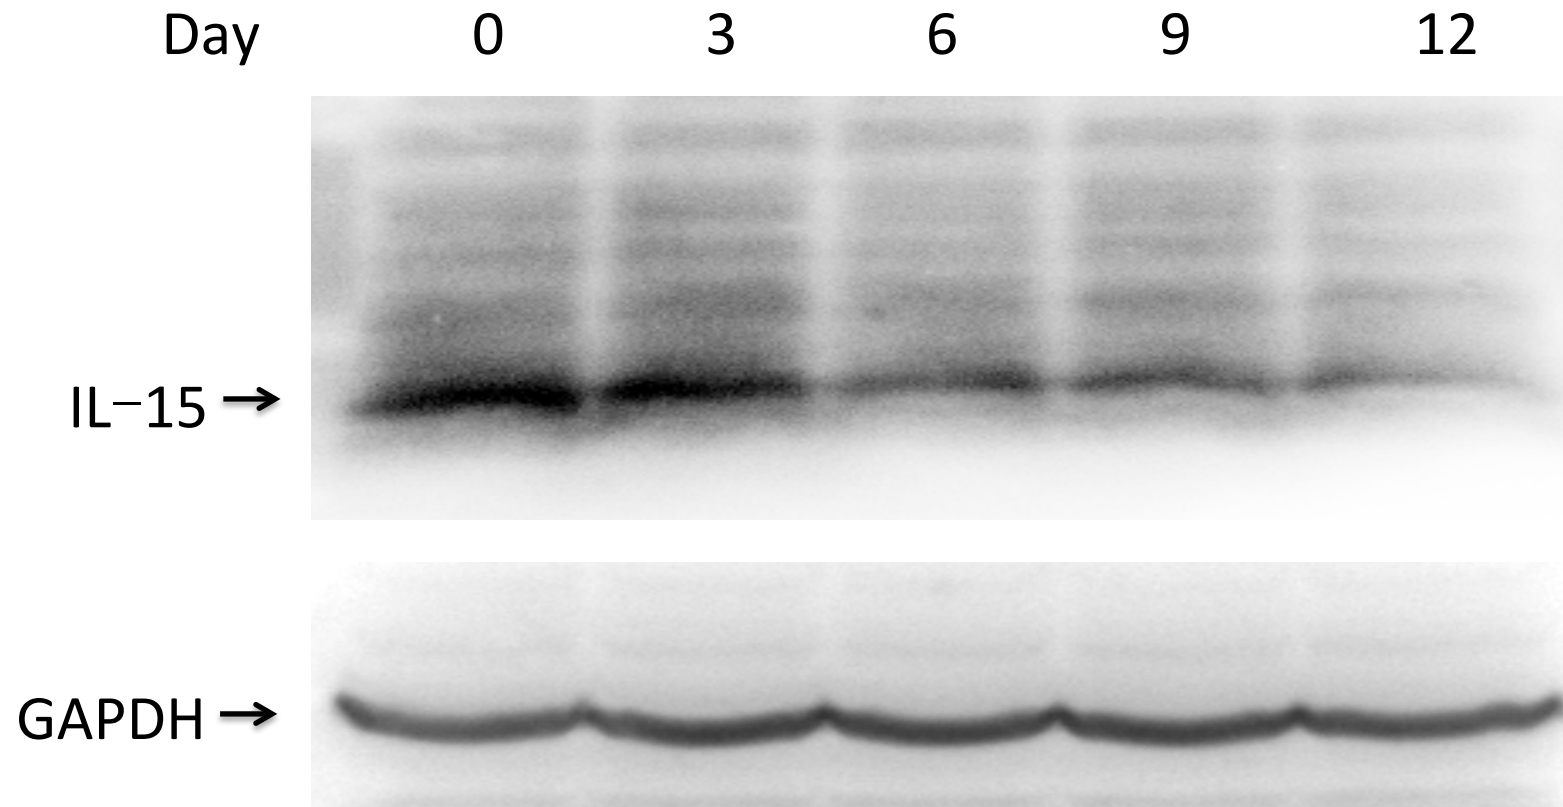

# Raw data for Figure 4c

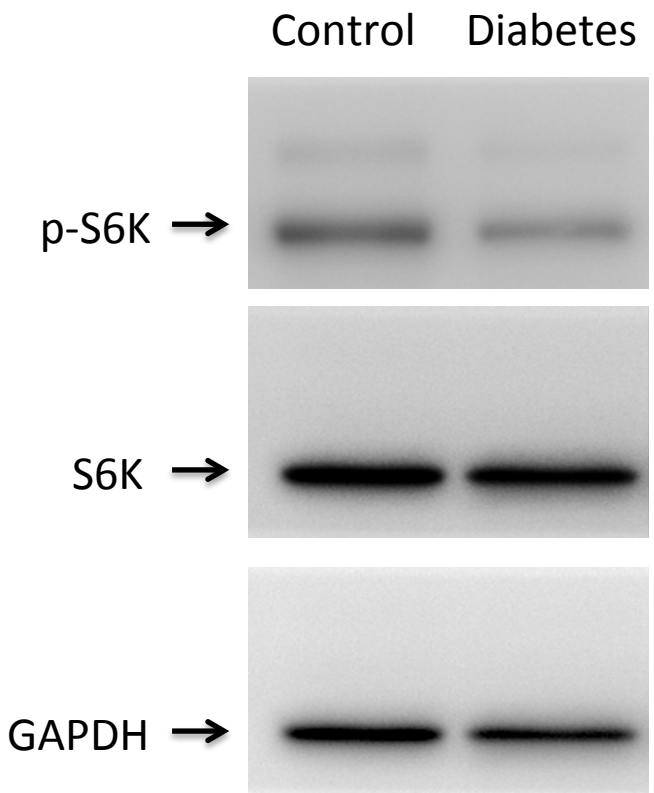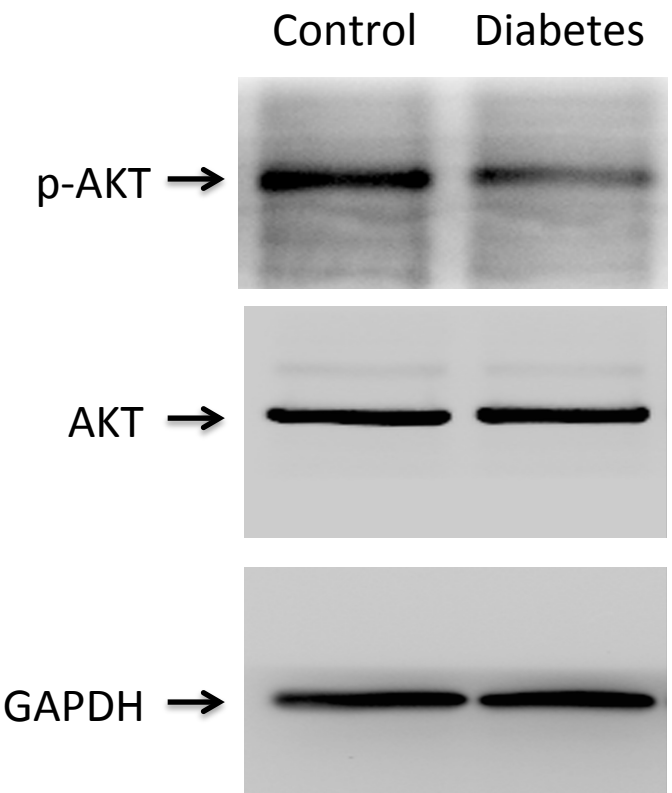

# Raw data for Figure 5b

IGF-1 (ng/ml)

0

20

40

80

100

IL-15 →

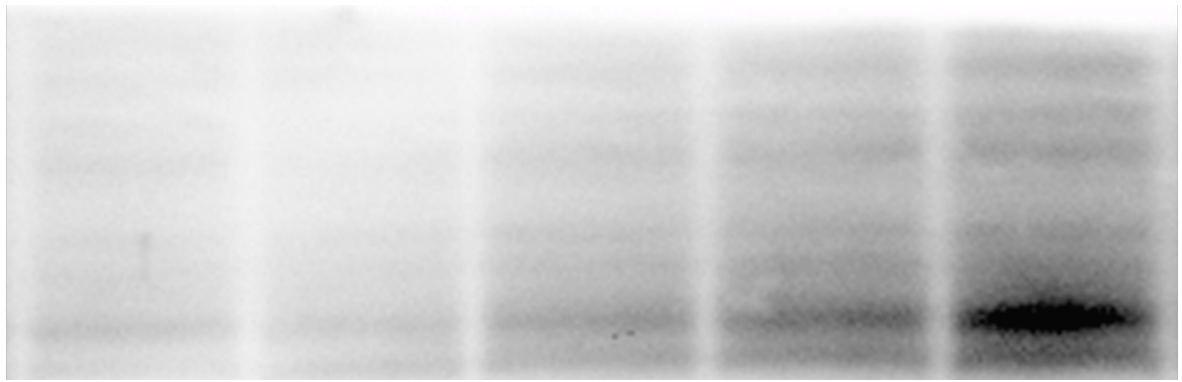

GAPDH →

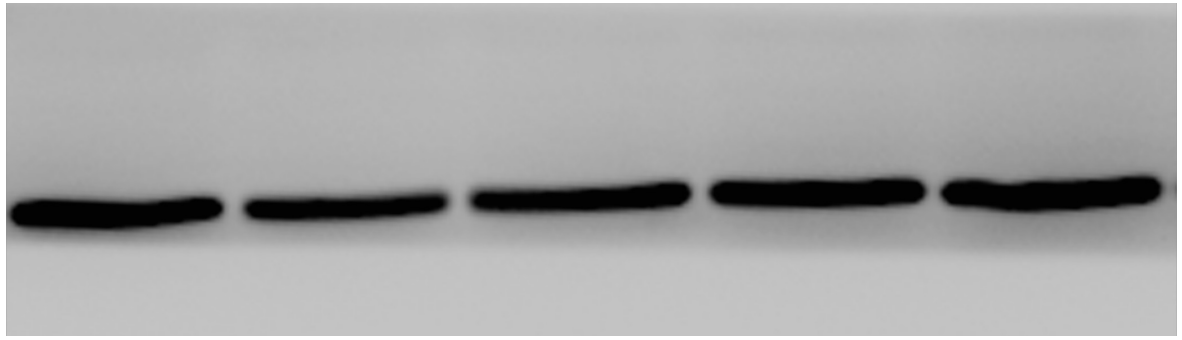

# Raw data for Figure 5c

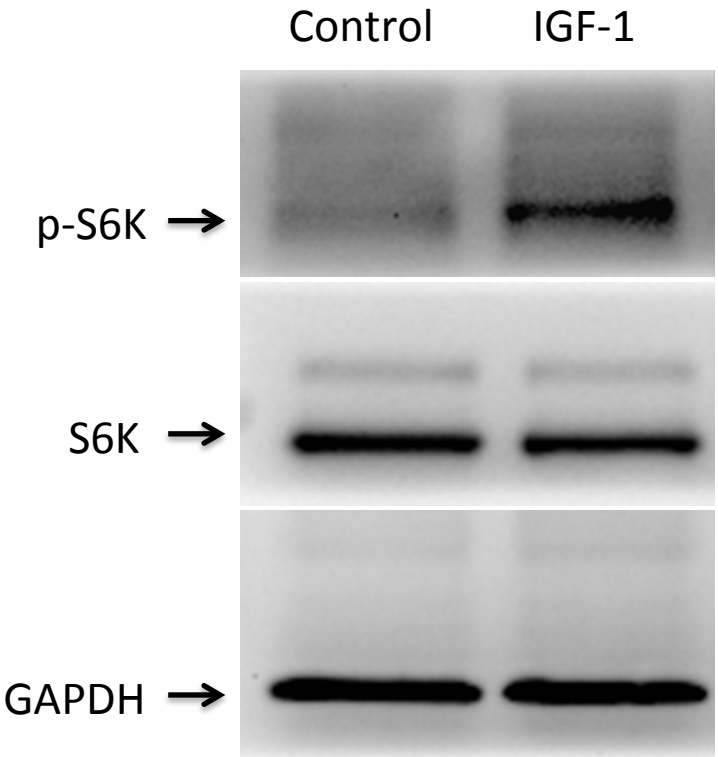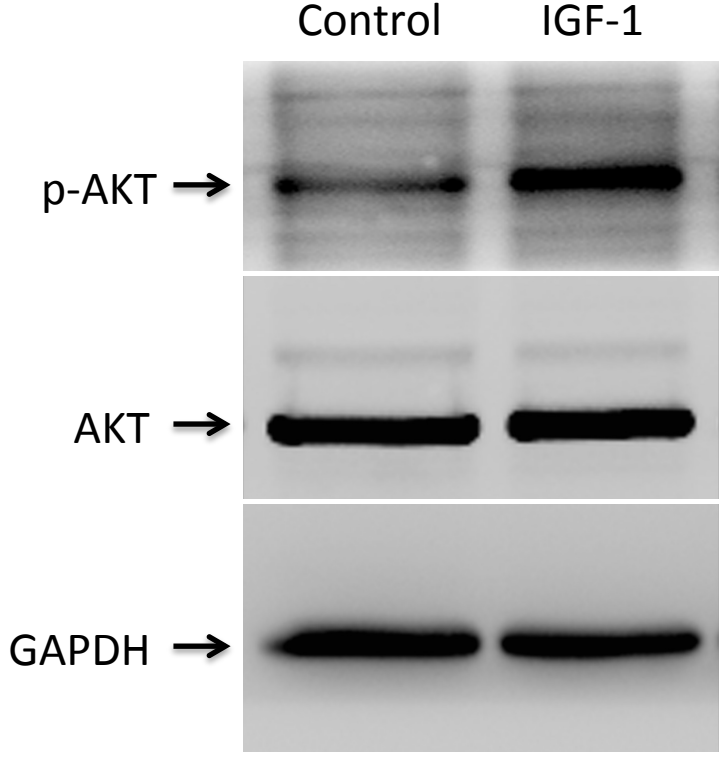



# Raw data for Figure 5d

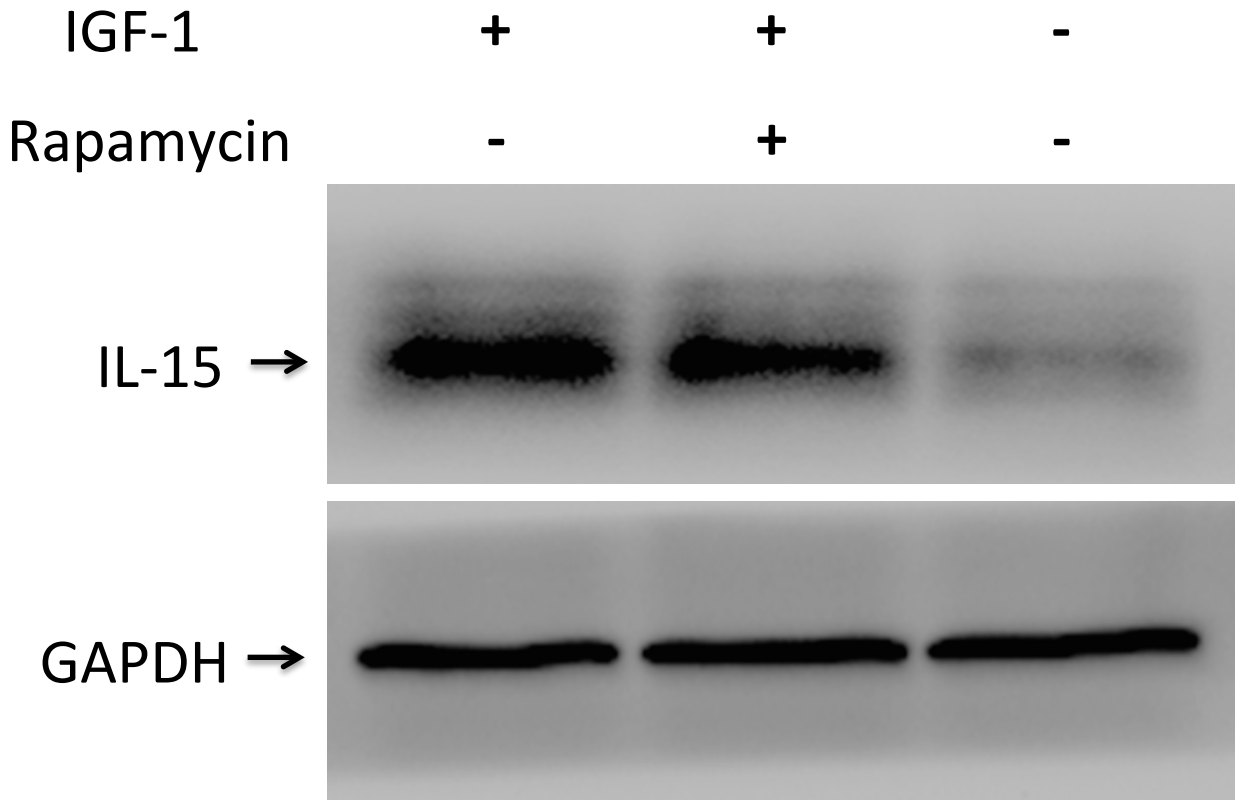

# Raw data for Figure 6a

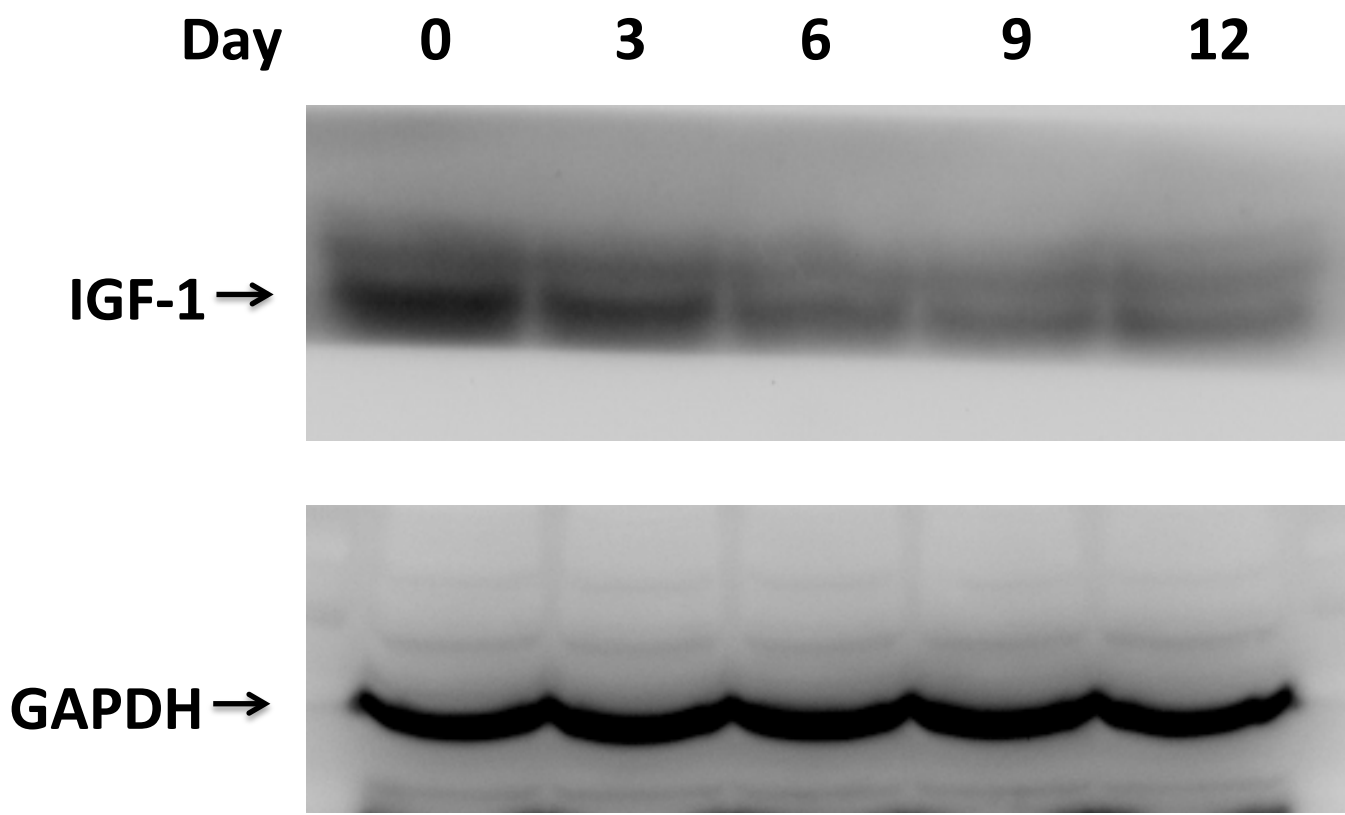

# Raw data for Figure 6b

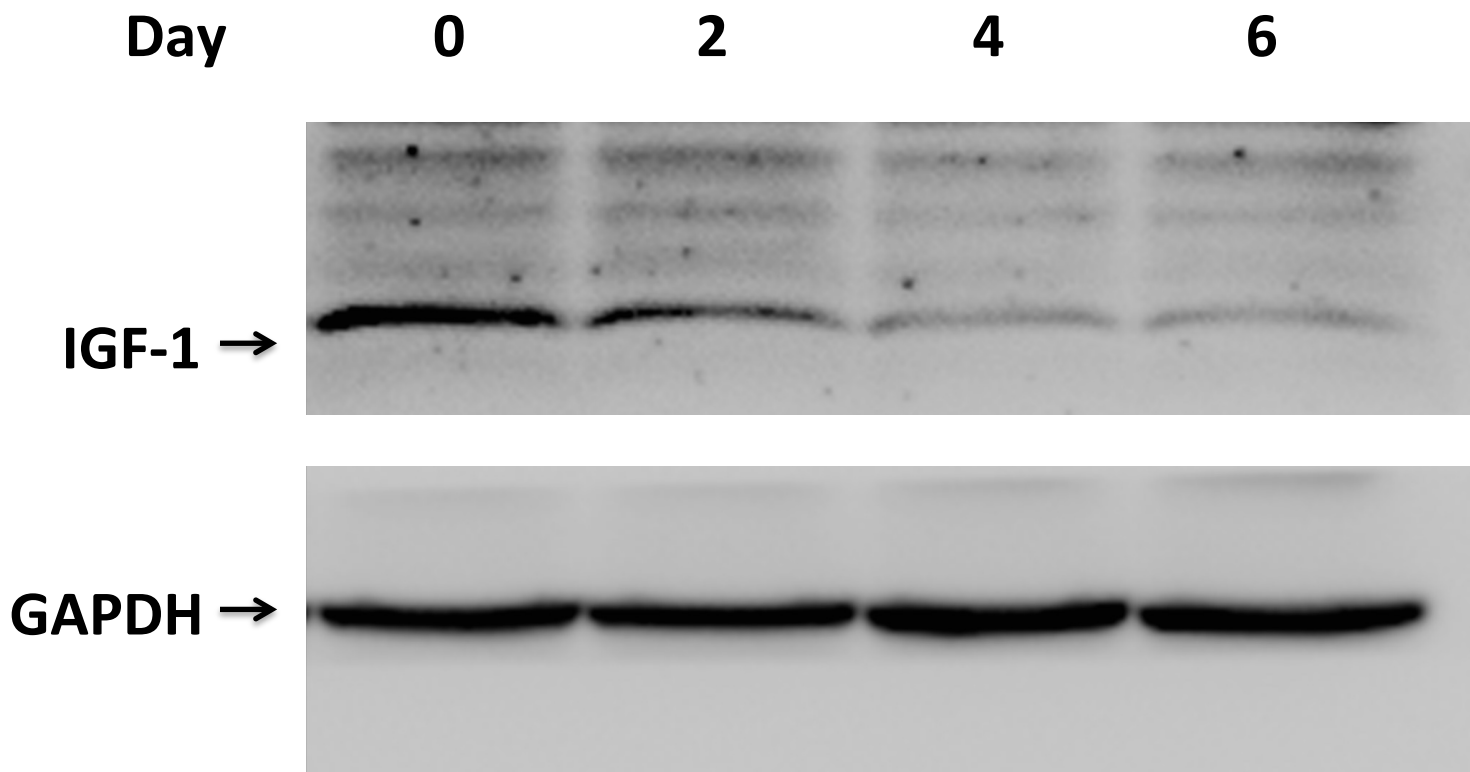

Supplement: 41598_2017_5950_MOESM1_ESM.pdf [file 41598_2017_5950_MOESM1_ESM.pdf]
